# Supplementary material for: MET Is Required for the Maximal Action of 20-Hydroxyecdysone during Bombyx Metamorphosis
Source: PubMed Central journal article supplement (PMC3531340; doi:10.1371/journal.pone.0053256), 2012-12-27

# Figure S1

**A**

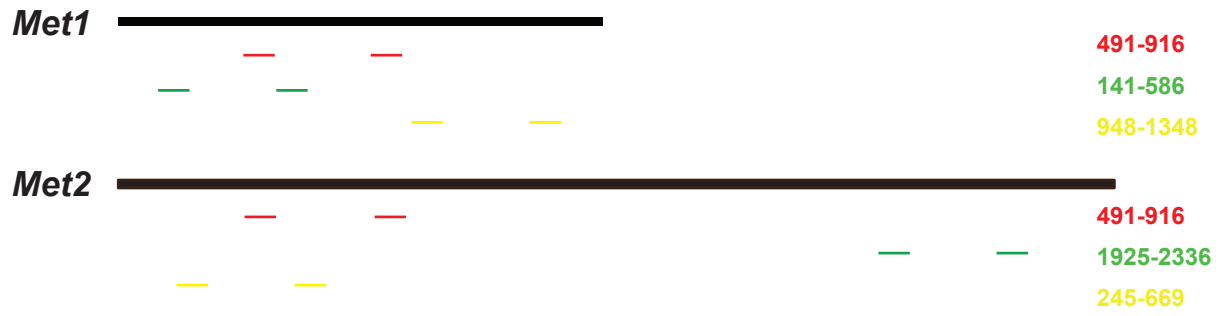

**B**

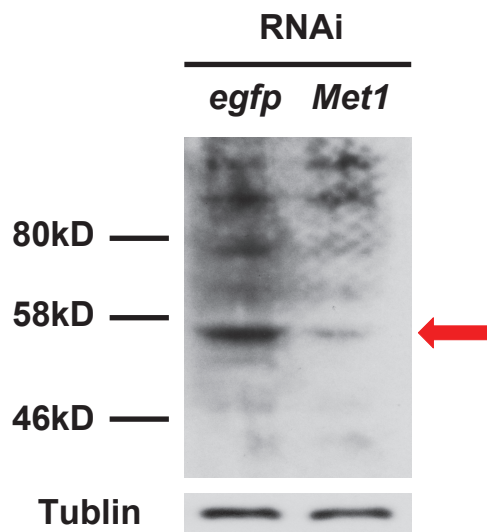

**C**

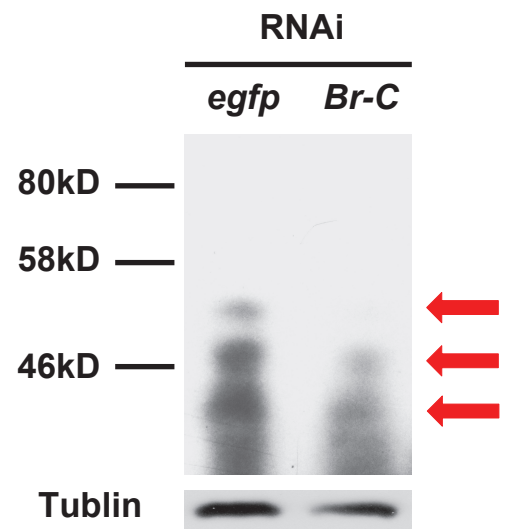

Supplement: pone.0053256.s001.pdf [file pone.0053256.s001.pdf]
