# Supplementary material for: MET Is Required for the Maximal Action of 20-Hydroxyecdysone during Bombyx Metamorphosis
Source: PubMed Central journal article supplement (PMC3531340; doi:10.1371/journal.pone.0053256), 2012-12-27

# Figure S4

**A**

| dsRNA       | Injected larvae | Larvae,% |      | Prepupae,% |      | Pupae,% |      | Total lethality,% |
|-------------|-----------------|----------|------|------------|------|---------|------|-------------------|
|             |                 | 24h      | 48h  | 24h        | 48h  | 24h     | 48h  |                   |
| <i>egfp</i> | 19              | 31.6     | 0    | 0          | 5.3  | 68.4    | 94.7 | 5.3               |
| <i>Met</i>  | 33              | 69.7     | 60.7 | 24.2       | 30.3 | 6.1     | 9    | 81.8              |
| <i>EcR</i>  | 22              | 90.9     | 77.3 | 9.1        | 22.7 | 0       | 0    | 90.9              |

**B**

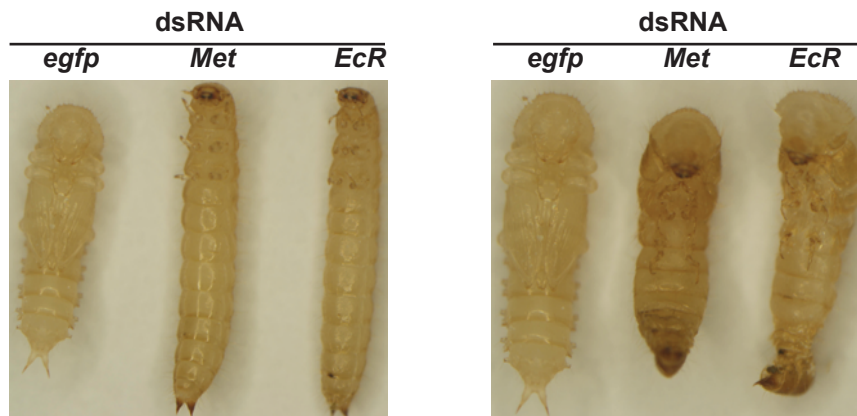

**C**

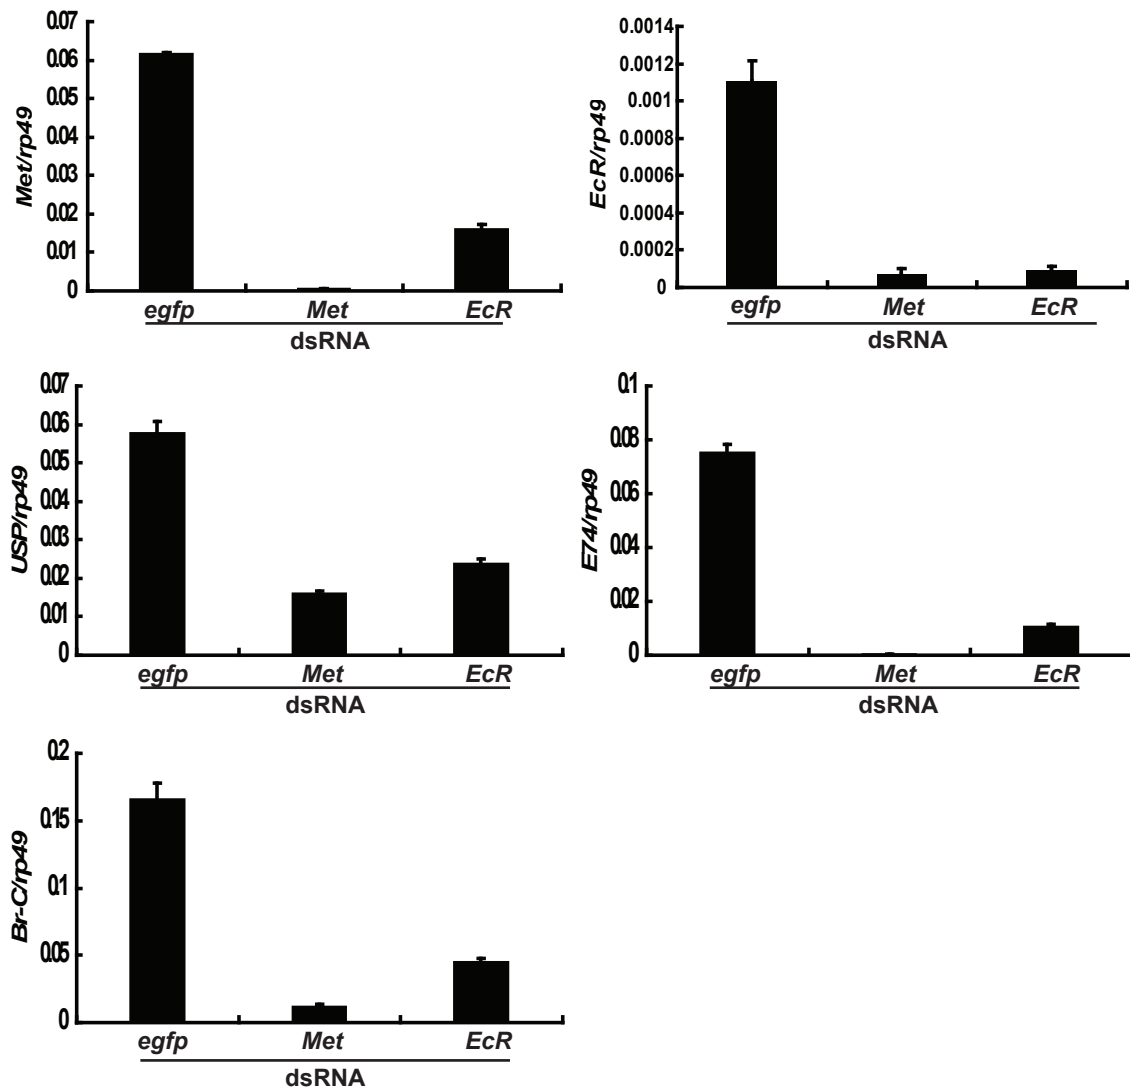

Supplement: pone.0053256.s004.pdf [file pone.0053256.s004.pdf]
