# Supplementary material for: MET Is Required for the Maximal Action of 20-Hydroxyecdysone during Bombyx Metamorphosis
Source: PubMed Central journal article supplement (PMC3531340; doi:10.1371/journal.pone.0053256), 2012-12-27

# Figure S5

## A

| IP  | Blot     | 20E |   |
|-----|----------|-----|---|
|     |          | -   | + |
|     | HA-EcR   |     |   |
| IgG | FLAG-USP |     |   |
|     | V5-MET1  |     |   |

## B

|                  |   |   |
|------------------|---|---|
| <i>HA-EcR</i>    | - | + |
| <i>FLAG-USP</i>  | - | + |
| <i>V5-MET1</i>   | + | - |
| <i>cMyc-MET2</i> | + | - |

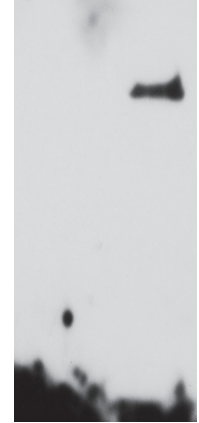

Supplement: pone.0053256.s005.pdf [file pone.0053256.s005.pdf]
